# Supplementary material for: Efficient polymer solar cells based on a cathode interlayer of dicyanomethylenated indacenodithiophene derivative with large π-conjugation and electron-deficient properties
Source: Royal Society of Chemistry journal article supplement (doi:10.1039/c7tc05055k), 2017-11-27
Supplement: c7tc05055k1.pdf [file c7tc05055k1.pdf]

## **Supplementary Information**

### **Efficient polymer solar cells based on a cathode interlayer of dicyanomethylenated indacenodithiophene derivative with large $\pi$ -conjugated and electron-deficient properties**

Yang Miao, Hanbo Yu, Yuewei Zhang, Xianju Yan, Jingying Zhnag\*,  
Yue Wang\*

State Key Laboratory of Supramolecular Structure and Materials, College  
of Chemistry, Jilin University, Changchun 130012, P.R. China.

E-mail: yuewang@jlu.edu.cn (Y. Wang)

## 1. Synthesis and characterizations

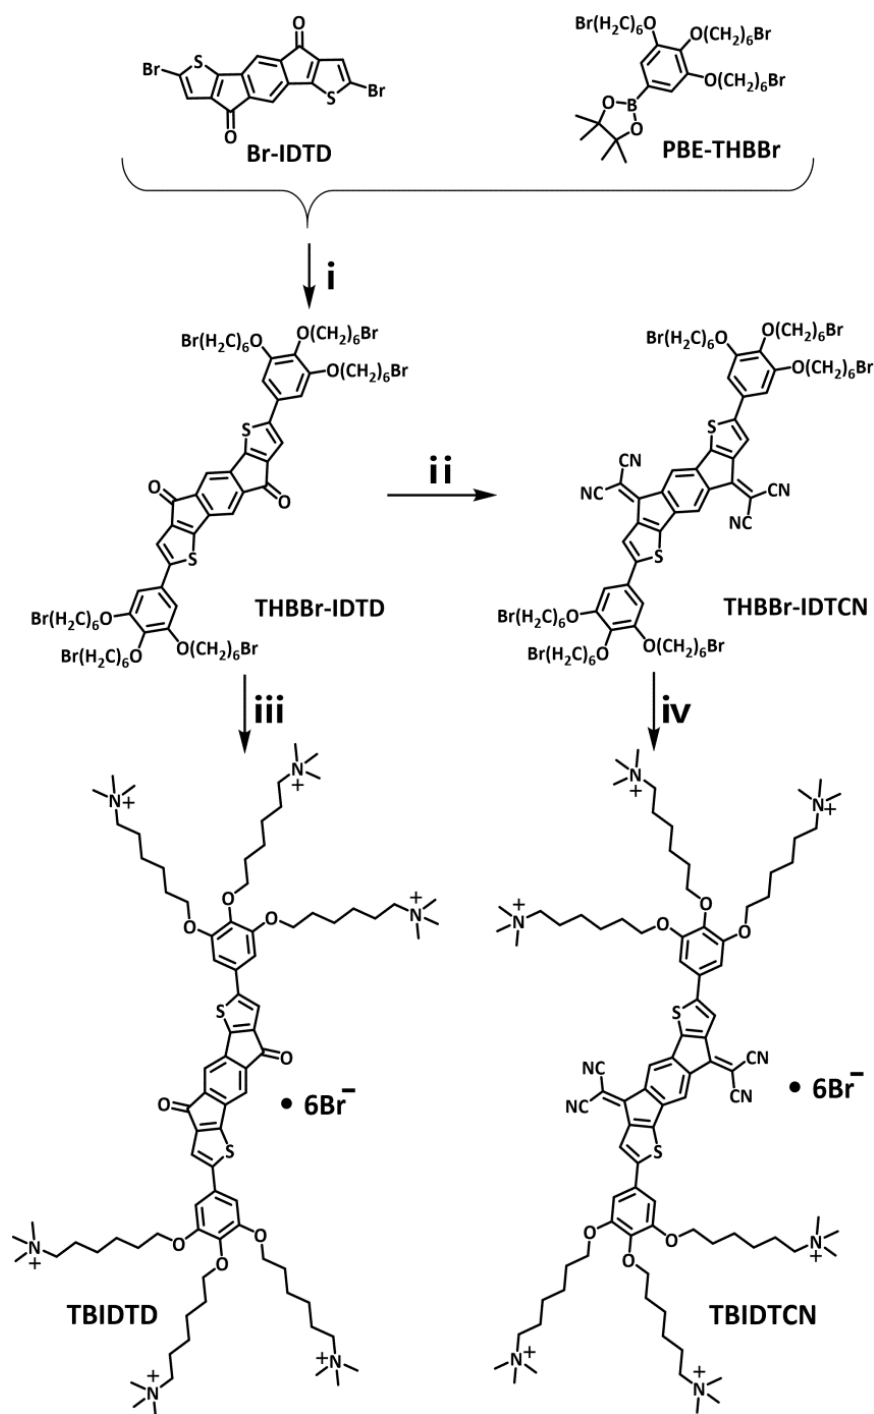

**Scheme S1.** Synthesis procedures of TBIDTD and TBIDTCN. i.  $\text{K}_2\text{CO}_3$ ,  $\text{Pd}(\text{PPh}_3)_4$ , toluene, reflux, 16 h; ii. malononitrile  $\text{TiCl}_4$ , pyridine,  $\text{CHCl}_3$ , reflux, 24 h; iii. Trimethylamine, THF, 48 h; iv. Trimethylamine, THF, 48 h.

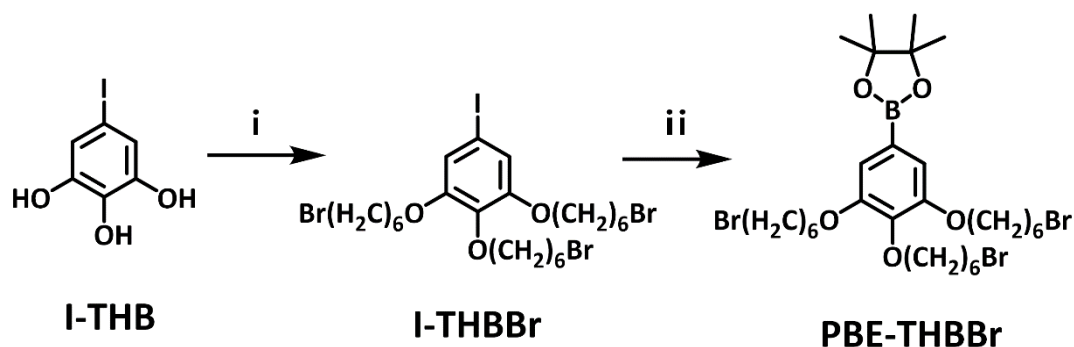

**Scheme S2.** Synthesis of PBE-THBBr. **i.** 1,6-Dibromohexane,  $K_2CO_3$ , DMF, r.t., 38 h; **ii.** n-BuLi, THF,  $-78\text{ }^\circ\text{C}$ , 12h.

**I-THBBr:** 5-Iodo-1,2,3-trihydroxybenzene (I-THB) (3.78 g, 15 mmol) was dissolved in N,N-Dimethylformamide (DMF) (80 mL), and the solution was degassed with nitrogen for 15 min. Then 1,6-Dibromohexane (18.3 g, 75 mmol) and  $K_2CO_3$  (20.7 g, 150 mmol) were added to the system. The reaction mixture was stirred at room temperature for 38 hours, after that, water was added to quench the reaction and the mixture was extracted with ethyl acetate, then the organic phase was washed with water and dried over anhydrous  $Na_2SO_4$ . The solvent was evaporated and the residue was purified with flash column chromatography ( $CH_2Cl_2$ /hexane 1: 2) to get the product as white solid (8.45 g, 76%).  $^1H$  NMR (500 MHz,  $CDCl_3$ )  $\delta$  6.87 (s, 2H), 4.00-3.90 (m, 6H), 3.4-3.42 (m, 6H), 1.97-1.87 (m, 6H), 1.87-1.80 (m, 4H), 1.79-1.72 (m, 2H), 1.59-1.48 (br, 12H). GC-MS (m/z):  $[M]^+$  calculated for  $C_{24}H_{38}Br_3IO_3$ : 741.2. Found: 741. Anal. Calcd for  $C_{24}H_{38}Br_3IO_3$ : C, 38.89; H, 5.17. Found: C, 38.92; H, 5.28.

**PBE-THBBr:** A solution of I-THBBr (7.41 g, 10 mmol) in dry THF (80 mL) was stirred under  $N_2$  at  $-78\text{ }^\circ\text{C}$ . After 10 min, a solution of n-BuLi (4.6 mL, 11 mmol) in hexane was added dropwise. The mixture kept on stirring for 90 min at  $-78\text{ }^\circ\text{C}$ , then the formed organolithium derivative was quenched by isopropoxyboronic acid pinacol ester (2.23 g, 12 mmol). The reaction mixture was stirred at room temperature for another 12 hours, subsequently. Then an

excess aqueous solution of ammonium chloride was added to the system to quench the reaction and the mixture was extracted with Et<sub>2</sub>O. The organic layer was washed with brine and dried over anhydrous Na<sub>2</sub>SO<sub>4</sub>. The solvent was evaporated and the residue was purified with flash column chromatography (CH<sub>2</sub>Cl<sub>2</sub>/hexane 3:1) to get the product as white solid (5.26 g, 71%). <sup>1</sup>H NMR (300 MHz, CDCl<sub>3</sub>) δ 6.99 (s, 2H), 4.10-3.92 (m, 6H), 3.42 (t, J = 6.8 Hz, 6H), 1.96-1.68 (br, 12H), 1.60-1.43 (br, 12H), 1.33 (s, 12H). GC-MS (m/z): [M]<sup>+</sup> calculated for C<sub>30</sub>H<sub>50</sub>BBr<sub>3</sub>O<sub>5</sub>: 741.3. Found: 741. Anal. Calcd for C<sub>30</sub>H<sub>50</sub>BBr<sub>3</sub>O<sub>5</sub>: C, 48.61; H, 6.80. Found: C, 48.95; H, 6.45.

## 2. Supplementary Figures

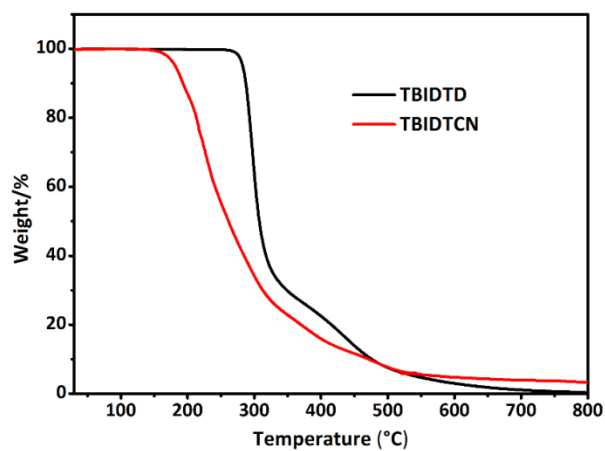

**Fig. S1.** TGA curves of TBIDTD and TBIDTCN.

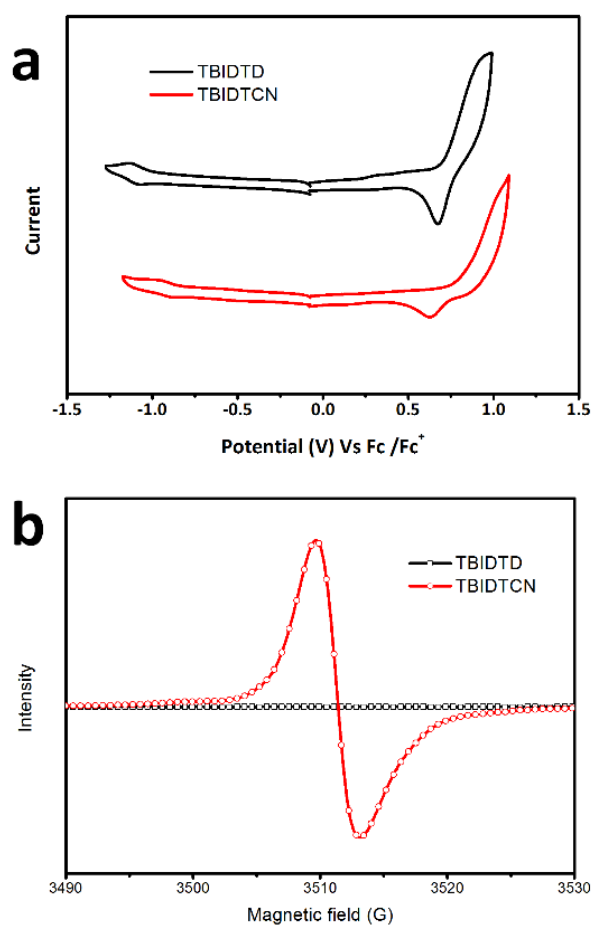

**Fig S2.** (a) Cyclic voltammograms of CILs at room temperature, 0.1 M TBAPF6 in CH<sub>3</sub>CN solution; (b) EPR spectra of the CILs in the solid state.

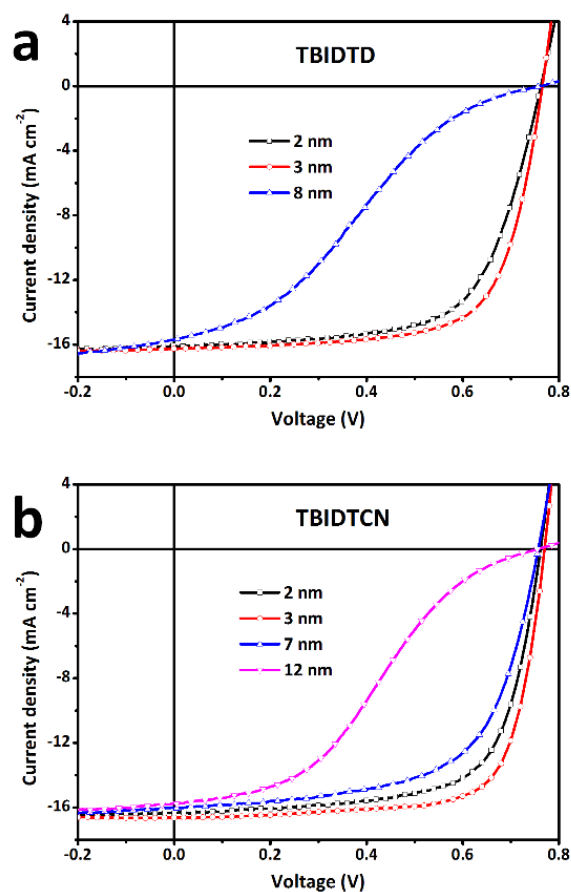

**Fig. S3.** Current density-voltage (J-V) curves of the PTB7:PC<sub>71</sub>BM based devices with different thicknesses of (a) TBIDTD and (b) TBIDTCN under the 100 mW cm<sup>-2</sup> AM 1.5G irradiation.

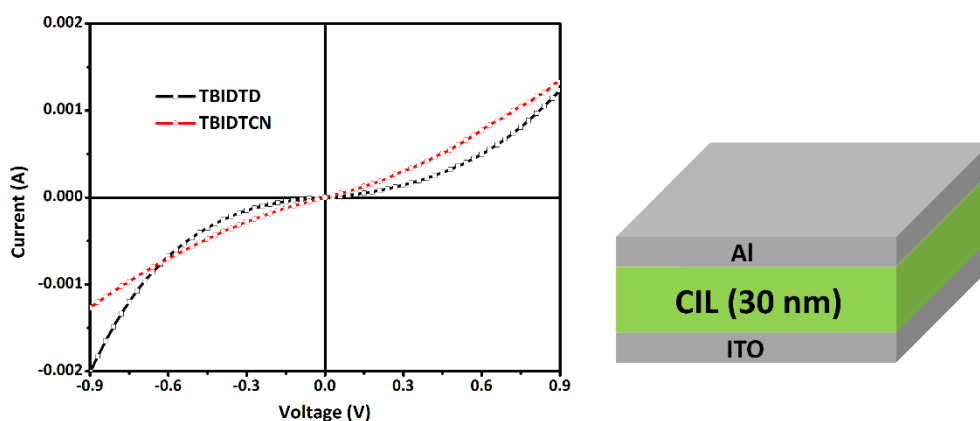

**Fig. S4.** (a) I-V curves of the conductivity measurements of TBIDTD and TBIDTCN with (b) a configuration of ITO/TBIDTD (TBIDTCN)/Al.

### 3. Supplementary Tables

**Table S1.** Device parameters of the PTB7:PC<sub>71</sub>BM based PSCs with different thicknesses of TBIDTD and TBIDTCN.

| CIL     | Thickness<br>(mg ml <sup>-1</sup> ) | Thickness<br>( nm ) | J <sub>sc</sub><br>(mA cm <sup>-2</sup> ) | V <sub>oc</sub><br>(V) | FF<br>(%) | PCE <sub>max</sub><br>(%) |
|---------|-------------------------------------|---------------------|-------------------------------------------|------------------------|-----------|---------------------------|
| TBIDTD  | 0.3                                 | 2                   | 16.14                                     | 0.763                  | 66.2      | 8.15                      |
|         | 0.5                                 | 3                   | 16.23                                     | 0.766                  | 69.3      | 8.62                      |
|         | 1                                   | 8                   | 15.69                                     | 0.758                  | 31.2      | 3.71                      |
| TBIDTCN | 0.3                                 | 2                   | 16.35                                     | 0.762                  | 68.9      | 8.60                      |
|         | 0.5                                 | 3                   | 16.57                                     | 0.768                  | 72.2      | 9.19                      |
|         | 1                                   | 7                   | 16.03                                     | 0.755                  | 65.2      | 7.89                      |
|         | 1.5                                 | 12                  | 15.75                                     | 0.755                  | 35.2      | 4.18                      |

**Table S2** Conductivity results, the conductivities were calculated from Ohm's law at the linear regions.

| CIL     | Thickness (nm) | Conductivity (S m <sup>-1</sup> ) |
|---------|----------------|-----------------------------------|
| TBIDTD  | 30             | 2.29×10 <sup>-5</sup>             |
| TBIDTCN | 30             | 6.13×10 <sup>-5</sup>             |
